# Supplementary material for: Accumulation rates over the past 260 years archived in Elbrus ice core, Caucasus
Source: Copernicus journal article supplement (doi:10.5194/cp-2023-46), 2023-06-28
Supplement: Supplementary file 1 [file cp-2023-46-supplement.pdf]

## Supplementary

**Table S1. Ice layers suspected to be had impacted by volcanic events**

| Ice layers | Depth (m) | Depth (mwe) | Volcanic event (A5) | Volcanic event (A3 & A4)                                                                 |
|------------|-----------|-------------|---------------------|------------------------------------------------------------------------------------------|
| (a)        | 140.0     | 106.9       | 1877/78 Cotopaxi ?  | 1872 Sinarka, 1872 Merapi, 1972 Vesuvius, 1873 Grimsvotn, 1875 Askja, 1877 Cotopaxi, ??? |
| (b)        | 146.38    | 112.57      |                     | 1854 Shiveluch                                                                           |
| (c)        | 149.16    | 115.03      | 1854 Shiveluch ?    | 1835 Cosigüina ?                                                                         |
| (d)        | 153.70    | 118.96      | 1835 Cosigüina      | 1815 Tambora                                                                             |
| (f)        | 154.73    | 119.84      |                     |                                                                                          |
| (e)        | 160.40    | 124.71      |                     | 1783 Laki                                                                                |

5

10

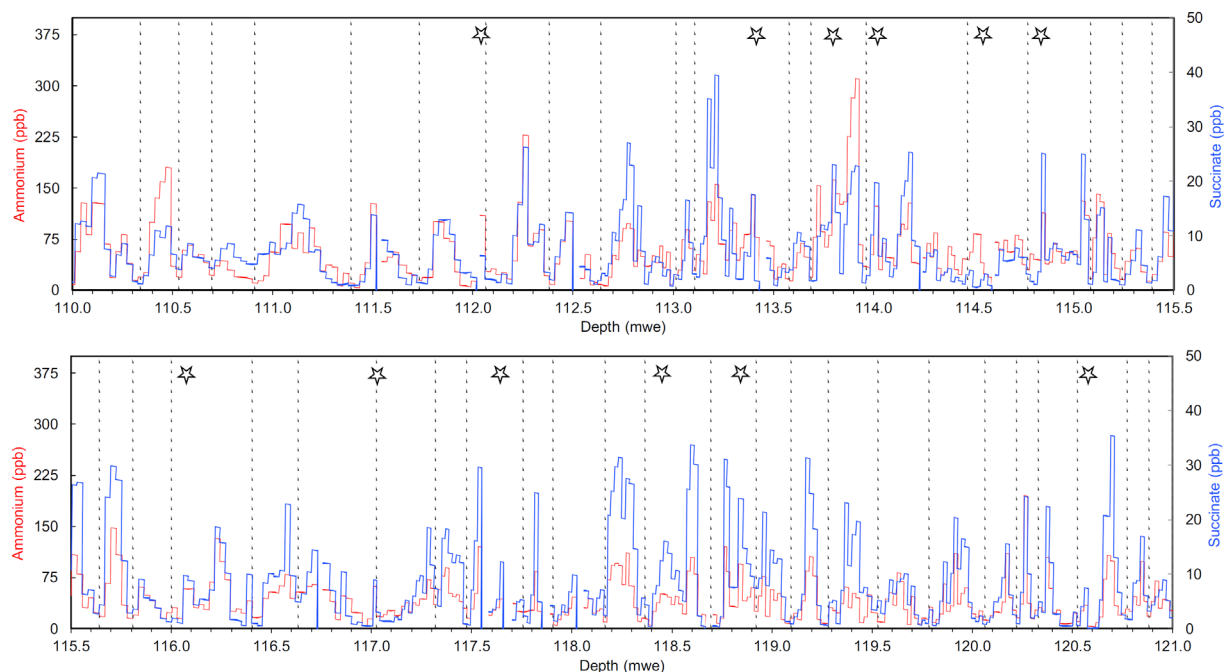

**S1 Annual layer counting between 110 and 121 mwe from co-authors A5 and A3. Vertical dashed lines denote yearly dissection proposed by co-author A5 based on identification of winter layers characterized by low concentrations of ammonium and succinate. Stars indicate where co-author A3 counted additional years with respect to those counted by co-author A5.**

15

In the following we evaluate in the extent to which the different dating are consistent with volcanic horizons and from that estimate dating uncertainties. As seen in Figure 2, below the Katmai horizon layer seen at 87.75 mwe, 5 layers (a to e) exhibit sulfate level exceeding 500 ppb together with acidity above  $5 \mu\text{Eq L}^{-1}$ . In addition, the layer (f) also revealed an acidity higher than  $5 \mu\text{Eq L}^{-1}$  whereas the sulfate level remained below 500 ppb. As seen in Table S1, we attributed layer (b) located at 112.57

20

mwe (dated at 1851) to the 1854 Shiveluch eruption (Kamchatka) of which the volcanic exclusivity index (VEI) was of 5 (Simkin & Siebert, 1994). Several candidates can explain the layer (a) located at 106.9 mwe (dated at 1874) including 1872 eruptions of Sinarka (Kurile Islands, VEI = 4) and Merapi (Java, VEI = 4), the 1873 eruption of Grimsvotn (Iceland, VEI = 4), the 1875 eruption of Askja (Iceland, VEI = 4), and the 1877 eruption of Cotopaxi (Ecuador, VEI = 4) as well as 1972 eruption of Vesuvius (Italy, VEI=3) located 2500 km to the west of Mt. Elbrus. For the layer (c) located at 115.03 mwe (dated

25

at 1842) we only identify the 1835 Cosigüina eruption (Nicaragua, VEI = 5) as possible candidate. It is, however, difficult to reconcile the dates of layer b (1851) and c (1842) and identify 22 years between them. The series of spikes located between 118 and 120 mwe was previously identified as possibly related to the 1835 Cosigüina eruption are now attributed to the 1815 Tambora eruption. It remains unclear, however, which layer (d dated at 1817 or f dated at 1813) corresponds to the 1815 Tambora eruption. Further studies including tephra analysis would here help to conclude. Finally, the layer (e) dated at 1789

30

may be related to the 1783 Laki eruption.

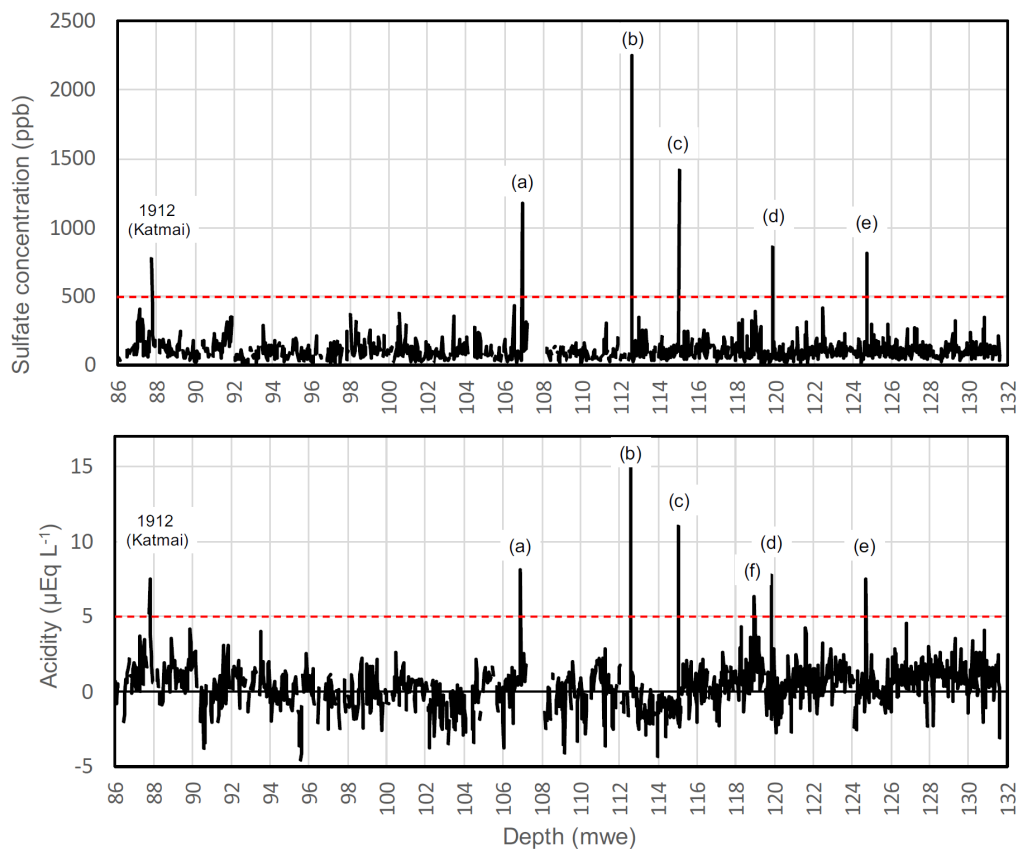

35 **S2. Raw profiles of sulfate and acidity in the Elbrus ice between 86 and 132 mwe. Samples considered to be impacted by large dust events has been removed (see Preunkert et al., 2019). In addition to the 1912 Katmai volcanic horizon at 87.75 mwe, several ice layers revealed sulfate concentrations exceeding 500 ppb (denoted (a) to (e)), and acidity higher than 5  $\mu\text{Eq L}^{-1}$  (denoted (a) to (f)) that would be related to other volcanic events (see Table 1). The horizontal red dashed lines indicate the sulfate concentration limit of 500 ppb, the acidity limit of 5  $\mu\text{Eq L}^{-1}$ .**

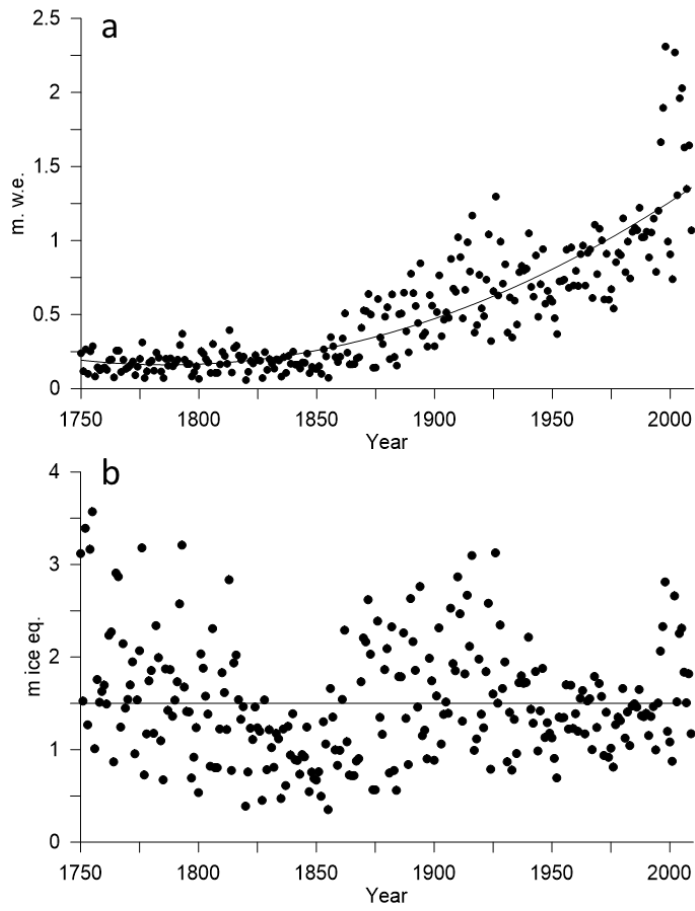

40 S3. Measured annual layer thickness in ice equivalent (a) and annual layer thickness corrected by the model of J. Nye (Dansgaard and Johnsen, 1969) (b)

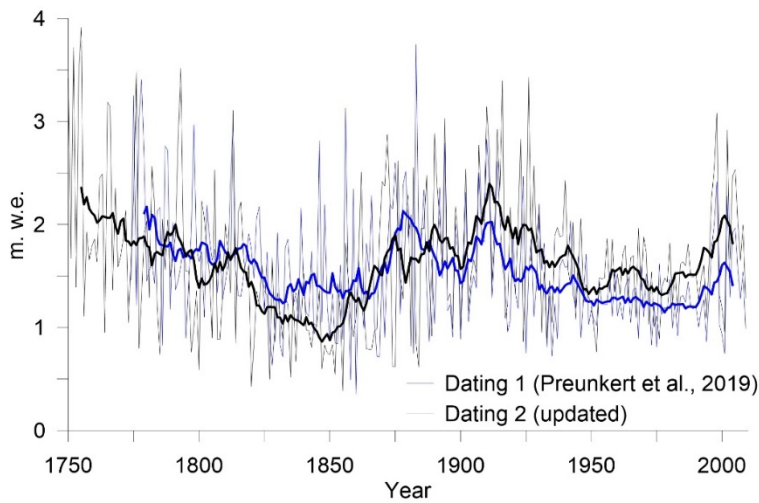

45 **S4 Reconstruction of annual snow accumulation at the WP using different dating (section 2.2.1). 10-year moving averages are shown in thick lines.**

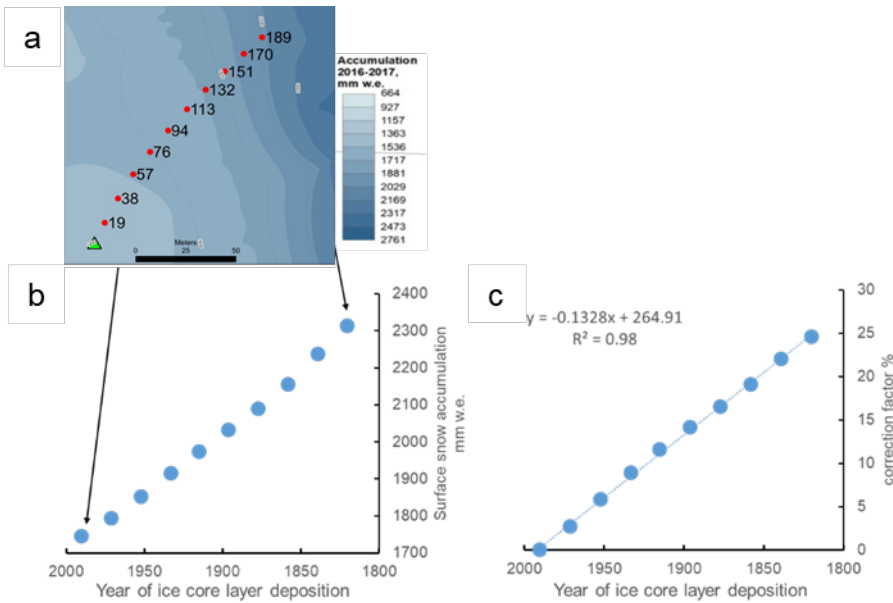

50 **S5 Surface snow accumulation distribution in 2016-2017 (Lavrentiev et al., 2022) (a), surface snow accumulation corresponding to age when the ice core layer was deposited on the glacier surface (b); correction factor to account for the surface accumulation distribution.**

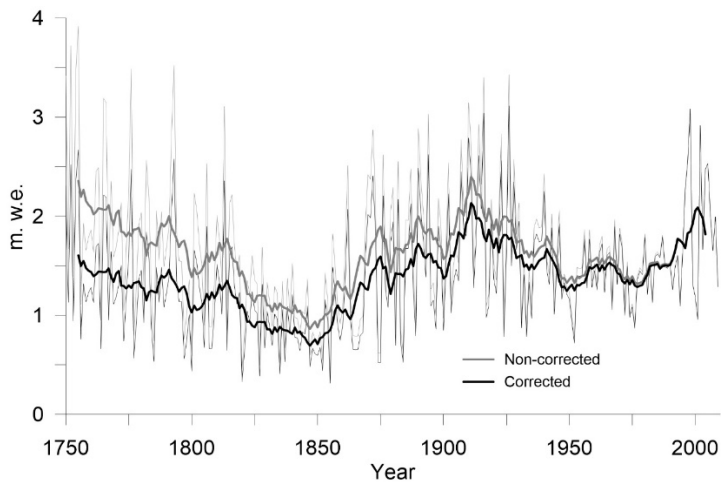

55 **S6 Reconstruction of annual snow accumulation at the WP non-corrected and corrected for snow accumulation surface distribution (section 2.3.2)**

60

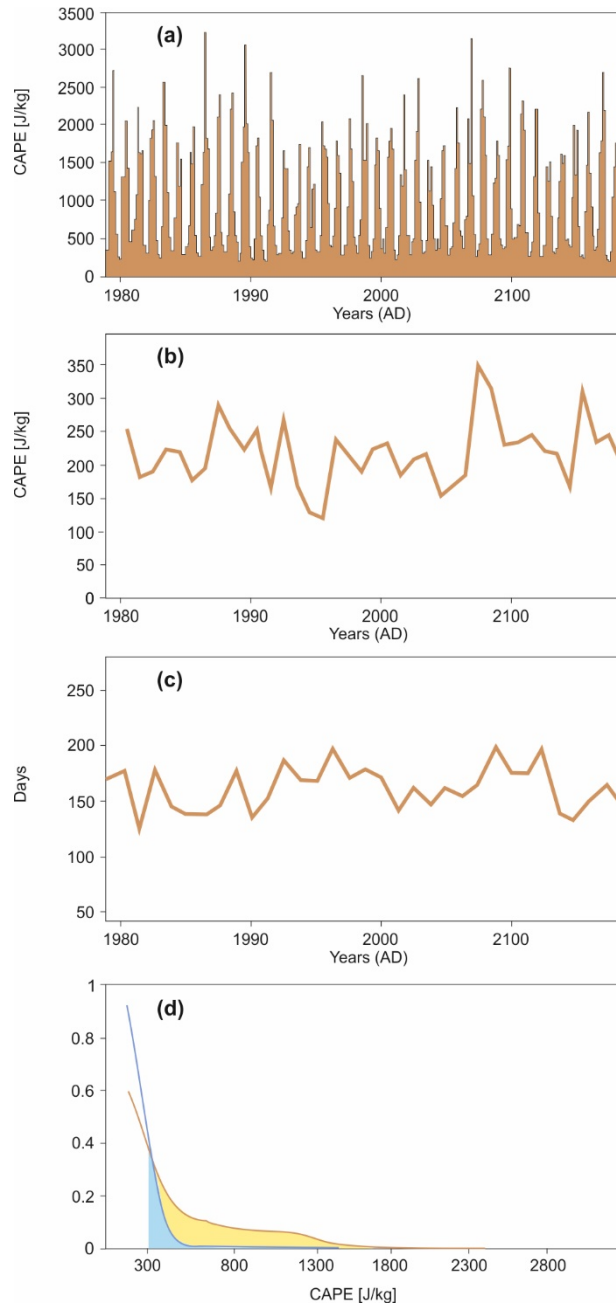

S7. Characteristics of CAPE in the Elbrus region for the period 1979 - 2017 according to CFSR reanalysis data: a) time course in 6-hour steps, b) average values for the warm half-year (May - September), c) number of days with CAPE > 300 Jkg<sup>-1</sup> for each year, d) empirical distribution function of CAPE in winter (November - March) and summer (May - September), colored areas correspond to the total proportion of CAPE > 300 Jkg<sup>-1</sup>, which in cold half-year is 7%, and in warm 40%

**Table S8 Seasonal calendar at WP calculated using CAPE**

| Summer     |            | Winter     |            |
|------------|------------|------------|------------|
| from       | to         | from       | to         |
| 12.05.1979 | 16.10.1979 | 17.10.1979 | 09.04.1980 |
| 10.04.1980 | 03.10.1980 | 04.10.1980 | 08.05.1981 |
| 09.05.1981 | 25.10.1981 | 26.10.1981 | 21.04.1982 |
| 22.04.1982 | 16.10.1982 | 17.10.1982 | 17.05.1983 |
| 18.05.1983 | 23.09.1983 | 24.09.1983 | 07.04.1984 |
| 08.04.1984 | 02.10.1984 | 03.10.1984 | 27.04.1985 |
| 28.04.1985 | 20.09.1985 | 21.09.1985 | 29.04.1986 |
| 30.04.1986 | 16.09.1986 | 17.09.1986 | 13.05.1987 |
| 14.05.1987 | 30.09.1987 | 01.10.1987 | 18.05.1988 |
| 19.05.1988 | 12.10.1988 | 13.10.1988 | 10.04.1989 |
| 11.04.1989 | 06.10.1989 | 07.10.1989 | 10.05.1990 |
| 11.05.1990 | 25.09.1990 | 26.09.1990 | 15.04.1991 |
| 16.04.1991 | 20.09.1991 | 21.09.1991 | 19.04.1992 |
| 20.04.1992 | 25.10.1992 | 26.10.1992 | 13.04.1993 |
| 14.04.1993 | 01.10.1993 | 02.10.1993 | 08.04.1994 |
| 09.04.1994 | 25.09.1994 | 26.09.1994 | 13.04.1995 |
| 14.04.1995 | 30.10.1995 | 31.10.1995 | 02.05.1995 |
| 03.05.1996 | 22.10.1996 | 23.10.1996 | 22.04.1997 |
| 23.04.1997 | 18.10.1997 | 19.10.1997 | 26.04.1998 |
| 27.04.1998 | 16.10.1998 | 17.10.1998 | 16.05.1999 |
| 17.05.1999 | 07.10.1999 | 08.10.1999 | 13.04.2000 |
| 14.04.2000 | 26.09.2000 | 27.09.2000 | 10.05.2001 |
| 11.05.2001 | 06.10.2001 | 07.10.2001 | 06.05.2002 |
| 07.05.2002 | 16.10.2002 | 17.10.2002 | 26.05.2003 |
| 27.05.2003 | 29.10.2003 | 30.10.2003 | 27.04.2004 |
| 28.04.2004 | 10.10.2004 | 11.10.2004 | 14.04.2005 |
| 15.04.2005 | 31.10.2005 | 01.11.2005 | 06.05.2006 |
| 07.05.2006 | 30.10.2006 | 31.10.2006 | 07.05.2007 |
| 08.05.2007 | 30.10.2007 | 31.10.2007 | 31.03.2008 |
| 01.04.2008 | 16.10.2008 | 17.10.2008 | 28.04.2009 |
| 29.04.2009 | 27.09.2009 | 28.09.2009 | 16.05.2010 |
| 17.05.2010 | 29.10.2010 | 30.10.2010 | 18.05.2011 |
| 19.05.2011 | 19.10.2011 | 20.10.2011 | 25.04.2012 |
| 26.04.2012 | 09.10.2012 | 10.10.2012 | 01.05.2013 |
| 02.05.2013 | 25.09.2013 | 26.09.2013 | 18.04.2014 |
| 19.04.2014 | 18.10.2014 | 19.10.2014 | 27.04.2015 |



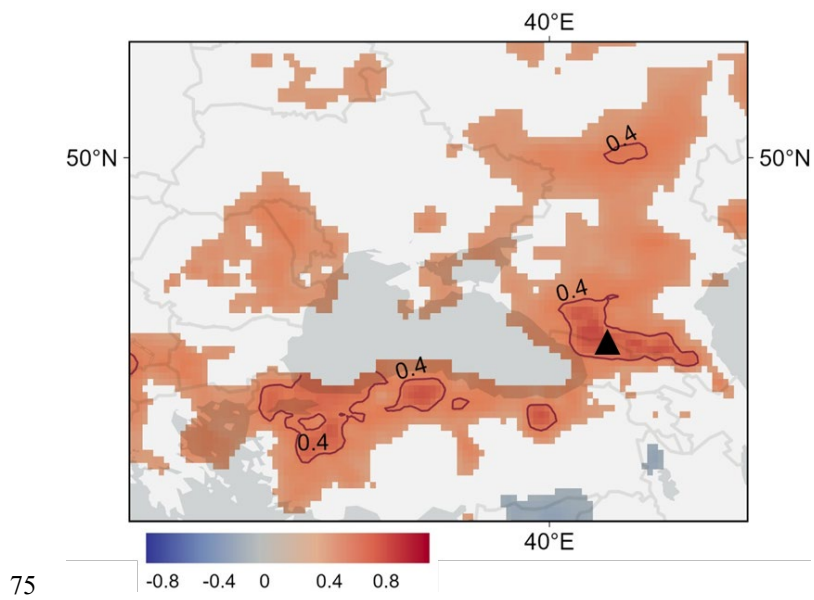

**S9. Spatial correlation of the winter WP accumulation with March precipitation data of the GPCP data set in 1950-2009 period.**
